# Supplementary material for: Lowering circulating apolipoprotein E levels improves aged bone fracture healing
Source: JCI journal article supplement (doi:10.1172/jci.insight.129144), 2019-09-18
Supplement: sd1 [file 1]

Supplementary Figures

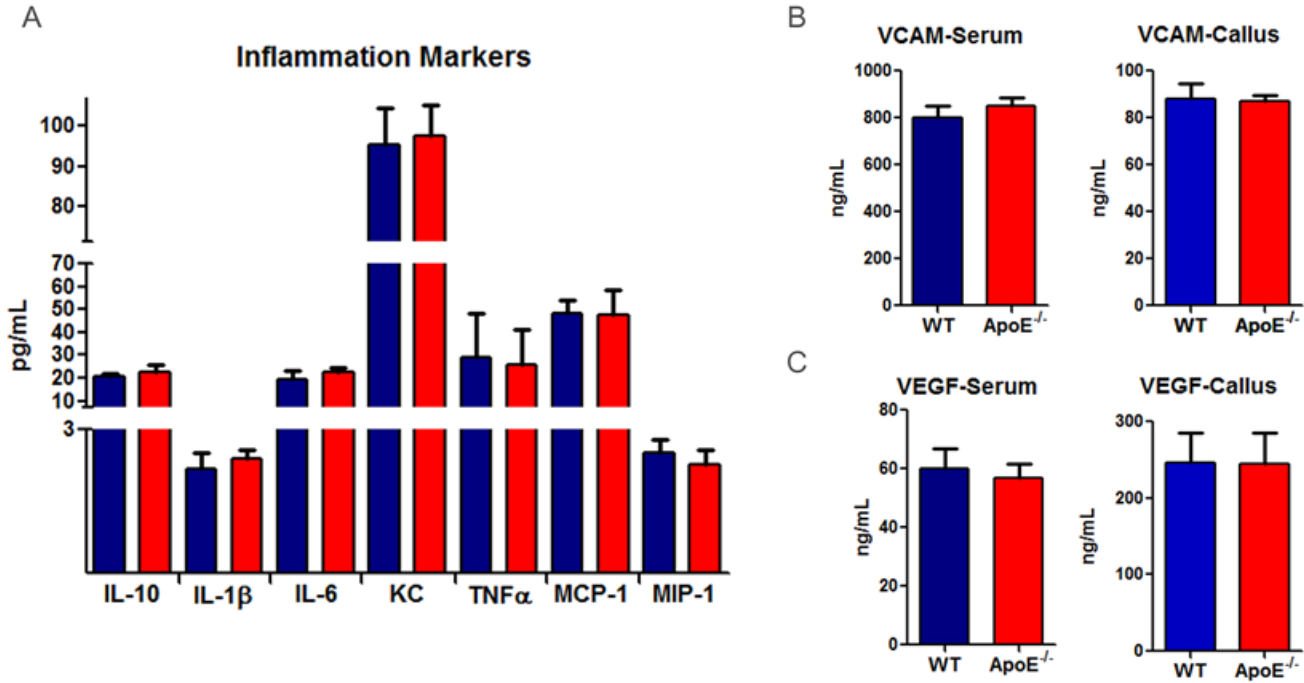

Supp. Figure 1 – Inflammatory and angiogenic biomarkers, 7d.

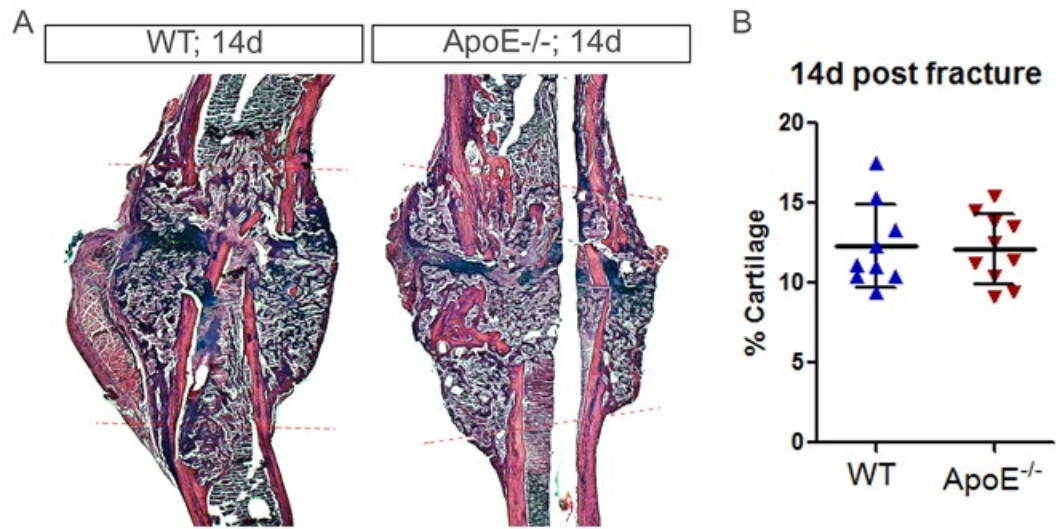

Supp. Figure 2 – Cartilage deposition, 14d callus.

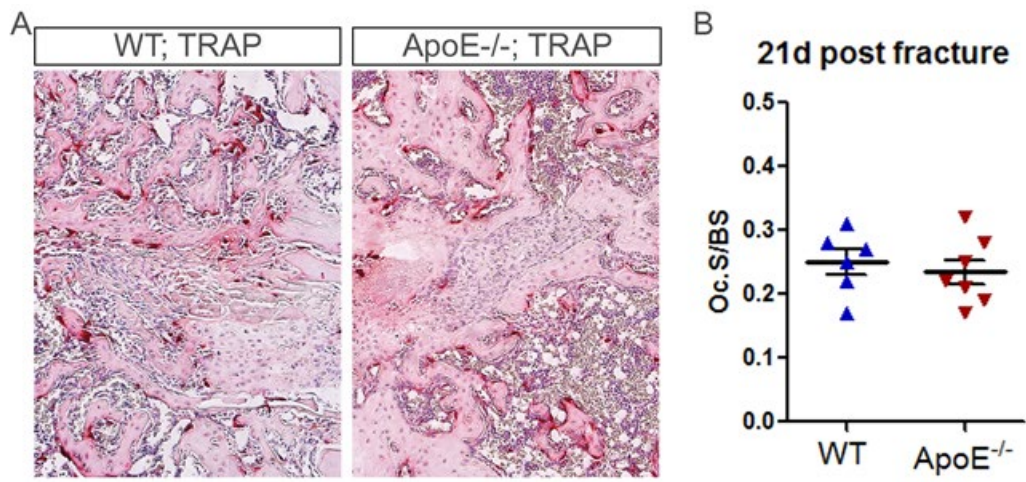

Supp. Figure 3 – TRAP staining, 21d callus.

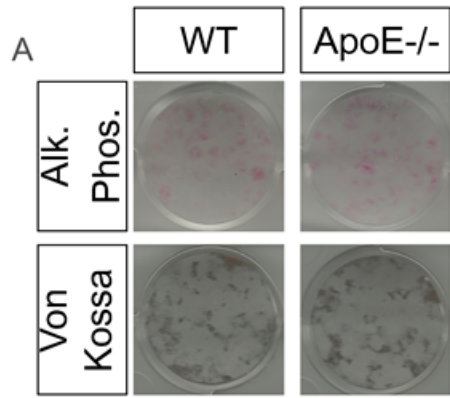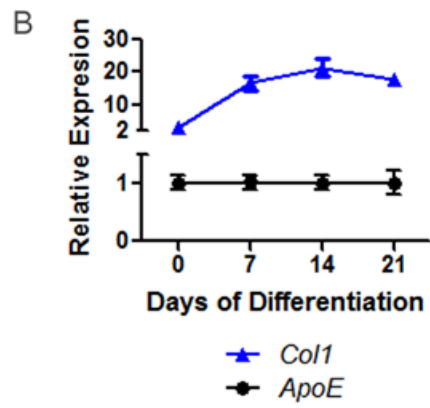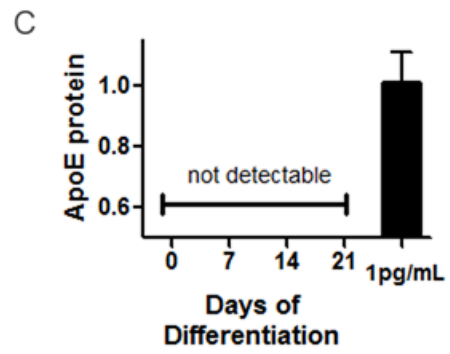

Supp. Figure 4 – ApoE is not produced by osteoblasts.

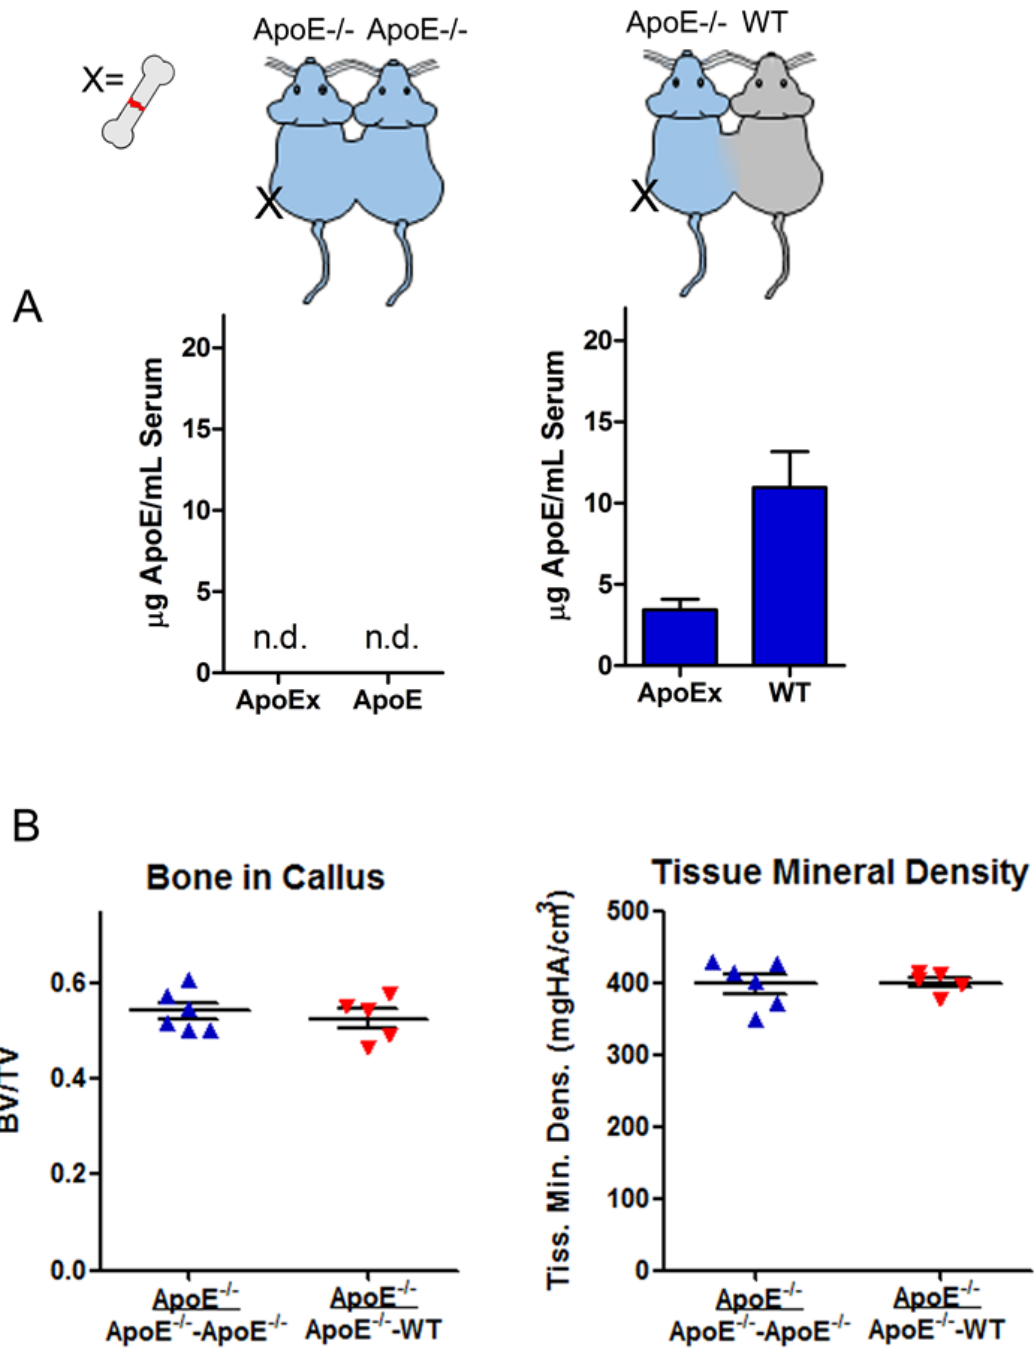

Supp. Figure 5 – Circulating ApoE and fracture healing.

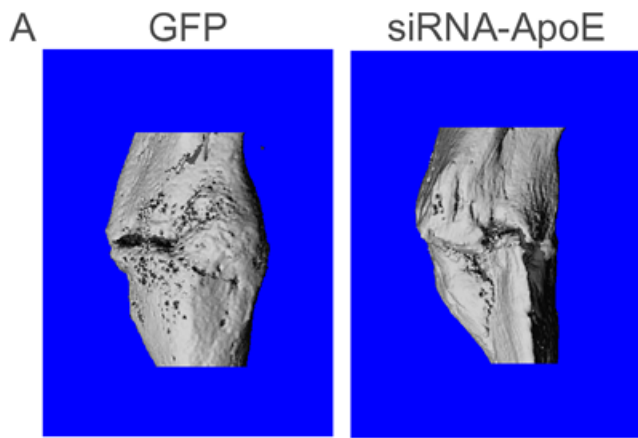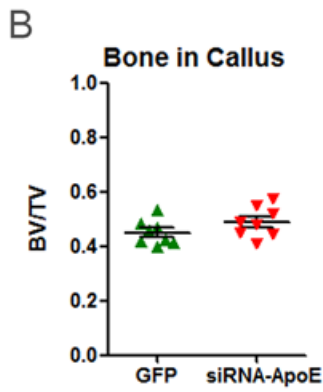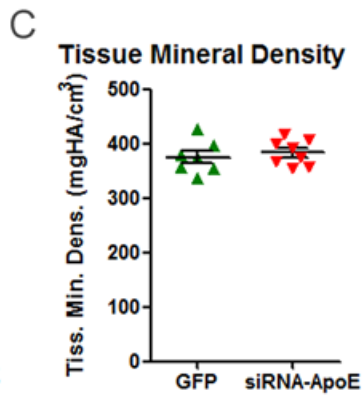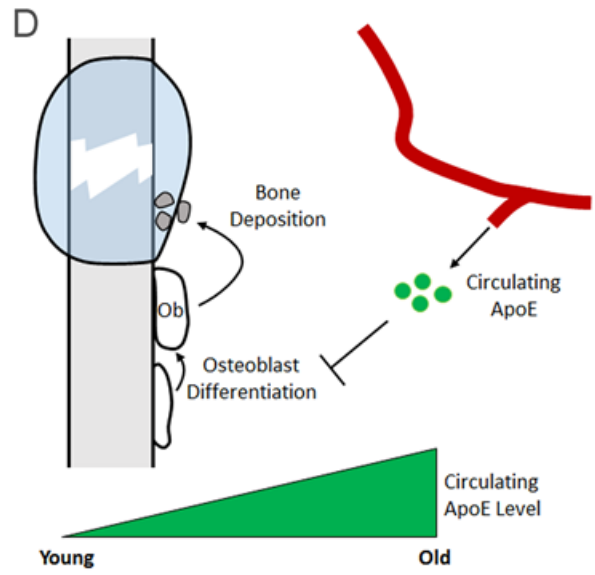

Supp. Figure 6 – Aged fracture healing and ApoE.
